# Supplementary material for: Systematic Review of the Prevalence and Incidence of Parkinson’s Disease in Asia
Source: PubMed Central journal article supplement (PMC3924097; doi:10.2188/jea.je20081034), 2009-11-05
Supplement: je-19-281-s001.pdf [file je-19-281-s001.pdf]

## Supplementary Data

### Appendix 1. Prevalence studies of Parkinson's disease (by region)

| Study                          | Study period | Design              | Case finding                                                                                                                          | Diagnostic criteria                                                                                                                                                  | Age of cases | Percent examined by specialists | Population | PD cases |
|--------------------------------|--------------|---------------------|---------------------------------------------------------------------------------------------------------------------------------------|----------------------------------------------------------------------------------------------------------------------------------------------------------------------|--------------|---------------------------------|------------|----------|
| Ferrara, Italy <sup>1</sup>    | 1967-1987    | Record-based study  | Medical records and prescriptions from hospitals, neurologists, national health insurance scheme, nursing home, general practitioners | Deterioration in neurological function in patients with $\geq 2$ of 4 cardinal signs                                                                                 | $\geq 35$    | 32%                             | 187 381    | 291      |
| San Marino, Italy <sup>2</sup> | 1985-6       | Record-based study  | Medical records from hospitals, general practitioners, pharmacies                                                                     | Deterioration in neurological function in patients with $\geq 2$ of 4 cardinal signs and exclusion of secondary causes                                               | All ages     | 97%                             | 22 322     | 34       |
| Sicily, Italy <sup>3</sup>     | 1987         | Door-to-door survey | 2 phases door-to-door survey, questionnaire, neurological examination                                                                 | $\geq 2$ of 4 cardinal signs, if not receiving antiparkinsonian drugs, Or $\geq 1$ of 4 cardinal signs, if improved by medications and exclusion of secondary causes | All ages     | 100%                            | 24 496     | 63       |
| Central Italy <sup>4</sup>     | 2001         | Record-based study  | Medical records from hospitals, general practitioners, nursing home and pharmacy records                                              | $\geq 2$ of 4 cardinal signs plus exclusion of other causes                                                                                                          | All ages     | Not stated                      | 297 424    | 682      |

| Study                             | Study period | Design                                  | Case finding                                                                                                               | Diagnostic criteria                                                                                                                                        | Age of cases | Percent examined by specialists                     | Population | PD cases |
|-----------------------------------|--------------|-----------------------------------------|----------------------------------------------------------------------------------------------------------------------------|------------------------------------------------------------------------------------------------------------------------------------------------------------|--------------|-----------------------------------------------------|------------|----------|
| Sardinia <sup>5</sup>             | 1972-4       | Record-based study                      | Medical records from hospitals, physicians, National Health Insurance, National Pension Institute                          | ≥ 2 of 4 cardinal signs plus exclusion of arteriosclerotic cause                                                                                           | ≥30          | 92.5%                                               | 1 473 800  | 967      |
| Northampton, England <sup>6</sup> | 1982         | Record-based study                      | General practitioners, hospital consultants                                                                                | Akinetic-rigid syndrome (Webster scale)                                                                                                                    | All ages     | Not stated                                          | 208 000    | 223      |
| Scotland <sup>7</sup>             | 1983-1984    | Record-based study                      | Medical records from hospitals, general practitioners                                                                      | >2 of 4 cardinal signs                                                                                                                                     | ≥ 40         | 38%                                                 | 151 616    | 249      |
| Northampton, England <sup>8</sup> | 1991-3       | Record-based study                      | General practitioners, hospital consultants                                                                                | PDS Brain Tissue Bank criteria                                                                                                                             | All ages     | 92.5%                                               | 302 000    | 384      |
| London, England <sup>9</sup>      | 1997         | Record-based study, follow-up at 1 year | Computerized records, Linkage scheme between the National Hospital of Neurology and Neurosurgery and general practitioners | UK Brain Bank Criteria                                                                                                                                     | ≥50          | Not stated                                          | 121 608    | 156      |
| France <sup>10</sup>              | 1988-9       | Door-to-door survey                     | 2-phase door-to-door survey, questionnaire, and neurological examination                                                   | ≥ 2 of 4 cardinal signs plus exclusion of other causes                                                                                                     | ≥65          | Household sample: 54%<br>Institutional sample: 100% | 3 149      | 60       |
| Spain <sup>11</sup>               | 1994         | Door-to-door survey                     | 2-phase door-to-door survey, questionnaire, and neurological examination                                                   | ≥ 2 of 4 cardinal signs if not receiving antiparkinsonian drugs, Or ≥ 1 of 4 cardinal signs, if improved by medications, and exclusion of secondary causes | ≥65          | 65.9%                                               | 5 278      | 81       |

| Study                                                                                  | Study period | Design              | Case finding                                                                             | Diagnostic criteria                                                                                                                                           | Age of cases | Percent examined by specialists | Population | PD cases |
|----------------------------------------------------------------------------------------|--------------|---------------------|------------------------------------------------------------------------------------------|---------------------------------------------------------------------------------------------------------------------------------------------------------------|--------------|---------------------------------|------------|----------|
| Spain <sup>12</sup>                                                                    | 1987-95      | Record-based study  | Medical records, physicians, and retirement homes                                        | UK Brain Bank Criteria                                                                                                                                        | All ages     | 84%                             | 60 724     | 134      |
| Rotterdam <sup>13</sup>                                                                | 1990-1993    | Door-to-door survey | 2 phases: door-to-door survey, questionnaire and neurological examination                | ≥ 2 of 4 cardinal signs if not receiving antiparkinsonian drugs<br>Or ≥ 1 of 4 cardinal signs if improved by medications<br>And exclusion of secondary causes | ≥ 55         | 100%                            | 6 969      | 97       |
| Bulgaria <sup>14</sup>                                                                 | 1999         | Record-based study  | Medical records                                                                          | ≥ 2 of 4 cardinal signs<br>And exclusion of secondary causes                                                                                                  | All ages     | 100%                            | 119 910    | 202      |
| Europarkinson collaborative study <sup>15</sup><br>(France, Italy, Netherlands, Spain) | 1988-1994    | Door-to-door survey | 2 phases: door-to-door survey, questionnaire and neurological examination                | ≥ 2 of 4 cardinal signs if not receiving antiparkinsonian drugs<br>Or ≥ 1 of 4 cardinal signs if improved by medications<br>And exclusion of secondary causes | ≥ 65         | 100%                            | 14 636     | 320      |
| Estonia <sup>16</sup>                                                                  | 1986-1996    | Record-based study  | Medical records from a hospital, general practitioners, family doctors, and nursing home | UK Brain Bank Criteria                                                                                                                                        | All ages     | 100%                            | 153 240    | 270      |

| Study                        | Study period | Design              | Case finding                                                                                                                                                                                | Diagnostic criteria                                                                                                                                                                                             | Age of cases | Percent examined by specialists | Population | PD cases |
|------------------------------|--------------|---------------------|---------------------------------------------------------------------------------------------------------------------------------------------------------------------------------------------|-----------------------------------------------------------------------------------------------------------------------------------------------------------------------------------------------------------------|--------------|---------------------------------|------------|----------|
| Manhattan, USA <sup>17</sup> | 1988-1993    | Record-based study  | Medical records from hospitals, private practitioners, nursing homes and other health-related facilities, local health maintenance organizations; interview and examination by neurologists | 1) Bradykinesia plus $\geq 1$ of other 3 cardinal signs<br>2) $\geq 3$ of<br>- unilateral onset<br>- persistence of asymmetry<br>- improvement by levodopa<br>- progressive course<br>- levodopa-induced chorea | All ages     | 100%                            | 213 302    | 228      |
| Argentina <sup>18</sup>      | 1991         | Door-to-door survey | 2-phase door-to-door survey: questionnaire, then examined by specialists                                                                                                                    | $\geq 2$ of 4 cardinal signs plus exclusion of other causes                                                                                                                                                     | $\geq 40$    | 100%                            | 7 765      | 51       |
| Brazil <sup>19</sup>         | 1997-2001    | Door-to-door survey | 2 phases: door-to-door survey, questionnaire to all residents $\geq 64$ years on census, then examined by specialists                                                                       | UK Brain Bank Criteria                                                                                                                                                                                          | $\geq 64$    | 100%                            | 1 186      | 39       |
| Bolivia <sup>20</sup>        | 1994         | Door-to-door survey | 2 phases: door-to-door survey of random cluster of 20% of population, questionnaire and neurological examination                                                                            | $\geq 2$ of 4 cardinal signs, at least 1 must be resting tremor or bradykinesia, exclude secondary causes                                                                                                       | $\geq 40$    | 90%                             | 9 955      | 5        |

| Study                           | Study period                                                            | Design                                             | Case finding                                                              | Diagnostic criteria                                                                                    | Age of cases | Percent examined by specialists | Population | PD cases |
|---------------------------------|-------------------------------------------------------------------------|----------------------------------------------------|---------------------------------------------------------------------------|--------------------------------------------------------------------------------------------------------|--------------|---------------------------------|------------|----------|
| Sydney, Australia <sup>21</sup> | 1997-9                                                                  | Sample from existing population-based cohort study | Participants of the Blue Mountains Eye Study                              | Physician's diagnosis and clinical feature of PD: tremor, rigidity, bradykinesia, poor righting reflex | ≥ 49         | 100%                            | 3 509      | 16       |
| Sydney, Australia <sup>22</sup> | 1998-1999<br>2002-2003<br>Pooled data from 2 studies (same methodology) | Door-to-door survey                                | 2 phases: door-to-door survey, questionnaire and neurological examination | ≥ 2 of resting tremor, bradykinesia, and rigidity plus exclusion of other causes                       | ≥ 55         | 100%                            | 1 028      | 36       |

## Appendix 2. Incidence studies of Parkinson's disease (by region)

| Study                                | Year      | Design                                                  | Case finding                                                                                                                                                          | Diagnostic criteria                                                                                                                                                      | Percent examined by neurologists | Population | PD cases |
|--------------------------------------|-----------|---------------------------------------------------------|-----------------------------------------------------------------------------------------------------------------------------------------------------------------------|--------------------------------------------------------------------------------------------------------------------------------------------------------------------------|----------------------------------|------------|----------|
| Ferrara, Italy <sup>1</sup>          | 1967-1987 | Record-based study                                      | Medical records and prescriptions from hospitals, neurologists, national health insurance scheme, nursing home, general practitioners                                 | Deterioration in neurological function in patients with $\geq 2$ of 4 cardinal signs                                                                                     | 32%                              | 187 381    | 394      |
| Italy <sup>23</sup>                  | 1992-1996 | Door-to-door survey with follow-up of 3.9 years         | 2 phases: door-to-door survey, questionnaire; if positive, examined by neurologists                                                                                   | $\geq 2$ of 4 cardinal signs if not receiving antiparkinsonian drugs; Or, $\geq 1$ of 4 cardinal signs if improved by medications                                        | 100%                             | 5 632      | 42       |
| Sweden <sup>24</sup>                 | 1986-1988 | Record-based study                                      | Patients/prescription reviews, examination by neurologists if not previously seen by expert                                                                           | All of:<br>1) $\geq 1$ of: tremor, rigidity, hypokinesia<br>2) insidious progression<br>3) no history of neuroleptics<br>4) no atypical signs<br>5) response to levodopa | >50%, but no exact number stated | 147 777    | 49       |
| Rotterdam, Netherlands <sup>25</sup> | 1990-1999 | Door-to-door survey, with follow-up period of 5.8 years | 2 phases: door-to-door survey<br>1) screen for signs of parkinsonism, method not stated<br>2) clinical examination by physicians specializing in neurologic disorders | >2 of 4 cardinal signs if not receiving antiparkinsonian drugs; Or, > 1 of 4 cardinal signs if improved by medications, and exclusion of secondary causes                | 100%                             | 6 839      | 67       |

| Study                        | Year      | Study design,                                      | Case findings                                                                                                                                                           | Diagnostic criteria                                                                                                                                         | Percent examined by neurologists    | Population | PD cases          |
|------------------------------|-----------|----------------------------------------------------|-------------------------------------------------------------------------------------------------------------------------------------------------------------------------|-------------------------------------------------------------------------------------------------------------------------------------------------------------|-------------------------------------|------------|-------------------|
| United Kingdom <sup>26</sup> | 1995-1996 | Record-based study                                 | General practitioner clinics with linkage to a referral hospital                                                                                                        | Not stated                                                                                                                                                  | 100%                                | 100 230    | number not stated |
| Cambridge, UK <sup>27</sup>  | 2000      | Record-based study from primary and secondary care | Referral from GP, neurologists, geriatricians, old-age psychiatrists, PD specialist nurse, hospital discharge coding departments                                        | UK Brain Bank Criteria                                                                                                                                      | 77%                                 | 708 715    | 201               |
| Spain <sup>28</sup>          | 1997-1998 | Door-to-door survey                                | Population aged $\geq 65$ yrs on census of specified areas; 2 phases: door-to-door survey, questionnaire: if positive, clinical examination                             | $\geq 2$ of 4 cardinal signs if not receiving antiparkinsonian drugs; Or, $\geq 1$ of 4 cardinal signs if improved by medications; and exclude other causes | 100%                                | 5 160      | 30                |
| Hawaii <sup>29</sup>         | 1965-1994 | Record-based study                                 | Honolulu Heart Study<br>- medical records (hospitals, neurologists' offices)<br>- death certificates<br>- rescreen with standardized questions and physical examination | $> 2$ cardinal signs plus clinical response to levodopa                                                                                                     | $> 50\%$ , actual figure not stated | 8 006      | 92                |

| Study                             | Year      | Study design,                                                         | Case findings                                                                                                                                                                                | Diagnostic criteria                                                                                                                                                                                                                                                   | Percent examined by neurologists | Population | PD cases |
|-----------------------------------|-----------|-----------------------------------------------------------------------|----------------------------------------------------------------------------------------------------------------------------------------------------------------------------------------------|-----------------------------------------------------------------------------------------------------------------------------------------------------------------------------------------------------------------------------------------------------------------------|----------------------------------|------------|----------|
| Rochester, USA <sup>30</sup>      | 1967-1979 | Record-based study                                                    | Medical records from general practitioners, specialty clinic in hospitals                                                                                                                    | Any of<br>1) diagnosis of parkinsonism by neurologists<br>2) all 3 of resting tremor, bradykinesia, rigidity<br>3) exaggerated glabellar reflex, reduced facial expression, unilateral or asymmetrical bradykinesia and rigidity<br>4) positive histological findings | 0%                               | Not stated | 118      |
| Olmsted, Minnesota <sup>31</sup>  | 1976-1990 | Record-based study                                                    | Medical records of the Rochester Epidemiology Project                                                                                                                                        | ≥2 of 4 cardinal signs, with<br>1) no secondary causes<br>2) levodopa responsive<br>3) no prominent or early signs of more extensive nervous system involvement                                                                                                       | 0%                               | 95 000     | 154      |
| Manhattan, USA <sup>17</sup>      | 1988-1993 | Record-based study, 85% of cases received at least 1 annual follow-up | Medical records from hospitals, private practitioners, nursing homes, and other health-related facilities, local health maintenance organizations; interview and examination by neurologists | 1) Bradykinesia plus >1 of other 3 cardinal signs<br>2) >3 of<br>- unilateral onset<br>- persistence of asymmetry<br>- improvement by levodopa<br>- progressive course<br>- levodopa-induced chorea                                                                   | 100%                             | 213 000    | 83       |
| Northern California <sup>32</sup> | 1994-1995 | Record-based study                                                    | Computerized databases of members of 1 health maintenance organization                                                                                                                       | 1) >2 of 4 cardinal signs, at least 1 must be either resting tremor or bradykinesia<br>2) No suggestion of another cause<br>3) No atypical features                                                                                                                   | 91%                              | Not stated | 588      |



### Appendix 3. Prevalence of Parkinson's disease (per 100 000 population)

| Studies                           | % previously undiagnosed         | Age at onset | Crude prevalence                                                                                                 | Age-specific prevalence                                                                                                                                    |
|-----------------------------------|----------------------------------|--------------|------------------------------------------------------------------------------------------------------------------|------------------------------------------------------------------------------------------------------------------------------------------------------------|
| Ferrara, Italy <sup>1</sup>       | Not stated                       | 62.6         | Crude rate (all ages): 164.75<br>Age-adjusted rate: 130.4<br>(standardized to Italian population)                | 35-39: 42.78<br>40-49: 103.89<br>50-59: 186.80<br>60-69: 381.52<br>70-79: 624.31<br>80-89: 783.17                                                          |
| San Marino, Italy <sup>2</sup>    | Not stated                       | 66.4         | Crude rate (all ages): 152<br>Age-adjusted rate (all ages): 185 (standardized to 1982 Emilia-Romagna population) | 0-54: 0<br>55-59: 80.3<br>60-64: 380.2<br>65-69: 573.3<br>70-74: 1236.0<br>75-79: 1950.3<br>80-84: 949.3<br>≥85: 0                                         |
| Sicily, Italy <sup>3</sup>        | 34.9% (men, 29.6%; women, 38.9%) | Not stated   | Crude rate (all ages): 257.2<br>Crude rate (≥40 years): 651.9                                                    | 0-49: 0<br>50-59: 115.6<br>60-69: 621.4<br>70-79: 1978.3<br>80-89: 3055<br>90-99: 0                                                                        |
| Central Italy <sup>4</sup>        | Not stated                       | Not stated   | Crude rate (all ages): 229.3<br>Age-adjusted rate (all ages): 163.6 (standardized to 1996 European population)   | 0-34: 0<br>35-44: 6.7<br>45-54: 49.1<br>55-64: 145.2<br>65-74: 563.7<br>75-84: 1289.3<br>≥85: 1705.5                                                       |
| Sardinia <sup>5</sup>             | Not stated                       | 55.8         | Crude rate (all ages): 65.6<br>Crude rate (≥50 years): 262                                                       | 30-39: 3.3<br>40-49: 38.6<br>50-59: 204.5<br>60-69: 342.1<br>70-79: 311.3<br>80-89: 82.6                                                                   |
| Scotland <sup>7</sup>             | Not stated                       | 65.3         | Crude rate (all ages): 164.2                                                                                     | 40-44: 12.5<br>45-49: 76.1<br>50-54: 82.6<br>55-59: 72.6<br>60-64: 239.8<br>65-69: 268.5<br>70-74: 707.4<br>75-79: 1019.6<br>80-84: 1792.1<br>≥ 85: 2205.3 |
| Northampton, England <sup>6</sup> | Not stated                       | Not stated   | Crude rate (all ages): 108                                                                                       | <50: 3<br>50-59: 64<br>60-69: 277<br>70-79: 702<br>80-99: 1136                                                                                             |

| Studies                           | %previously undiagnosed                                                                             | Age at onset | Crude prevalence                                                                                                 | Age-specific prevalence                                                                                                                            |
|-----------------------------------|-----------------------------------------------------------------------------------------------------|--------------|------------------------------------------------------------------------------------------------------------------|----------------------------------------------------------------------------------------------------------------------------------------------------|
| London, England <sup>9</sup>      | Not stated                                                                                          | Not stated   | Crude rate (all ages): 128<br>Age-adjusted rate: 168<br>(standardized to 1997 UK population)                     | 0-29: 0<br>30-39: 8<br>40-49: 12<br>50-59: 109<br>60-69: 342<br>70-79: 961<br>≥ 80: 1 265                                                          |
| Northampton, England <sup>8</sup> | Not stated                                                                                          | Not stated   | Crude rate (all ages): 121                                                                                       | <40: 0.6<br>40-44: 4<br>45-49: 10<br>50-54: 76<br>55-59: 111<br>60-64: 159<br>65-69: 343<br>70-74: 664<br>75-79: 856<br>80-84: 1 400<br>≥ 85: 1044 |
| France <sup>10</sup>              | 5%                                                                                                  | Not stated   | Crude rate (≥ 65 years): 1 400                                                                                   | 65-69: 500                                                                                                                                         |
| Spain <sup>11</sup>               | 28.4%                                                                                               | 70           | Crude rate (≥ 65 years): 1 500                                                                                   | 70-74: 1 600<br>75-79: 1 900<br>80-84: 3 200<br>≥ 85: 1 500                                                                                        |
| Spain <sup>12</sup>               | Not stated                                                                                          | 63.6         | Crude rate (all ages): 220.6<br>Age-adjusted rate: 121.9<br>(standardized to European standard population)       | 0-39: 3.3<br>40-49: 16.5<br>50-59: 100.2<br>60-69: 435.6<br>70-79: 953.3<br>80-89: 973.1<br>≥90: 263.1                                             |
| Rotterdam <sup>13</sup>           | 12%                                                                                                 | Not stated   | Crude rate (≥ 55 years): 1 400                                                                                   | 55-64: 300<br>65-74: 1200<br>75-84: 4200<br>85-94: 4300                                                                                            |
| Bulgaria <sup>14</sup>            | Not stated                                                                                          | 67.9         | Crude rate (all ages): 168.5<br>Crude rate (≥50 years): 558.3<br>(standardized to Bulgarian standard population) | 0-49: 0<br>50-54: 45.4<br>55-59: 100.9<br>60-64: 233.1<br>65-69: 541.8<br>70-74: 918.7<br>75-79: 2358.8<br>≥80: 3456.2                             |
| Europarkinson <sup>15</sup>       | 24%, varied from 11% in France, 13% in Netherlands, 26% in Girona, Spain and 52% in Pamplona, Spain | Not stated   | Crude rate (≥ 65 years): 2 006<br>Age-adjusted (≥ 65 years): 1 600<br>(standardized to 1991 European population) | 65-69: 625<br>70-74: 998<br>75-79: 2736<br>80-84: 3556<br>85-89: 3538<br>90-94: 2521<br>95-99: 625                                                 |

| Studies                         | %previously undiagnosed | Age at onset | Crude prevalence                                                                                                                                                                          | Age-specific prevalence                                                        |
|---------------------------------|-------------------------|--------------|-------------------------------------------------------------------------------------------------------------------------------------------------------------------------------------------|--------------------------------------------------------------------------------|
| Estonia <sup>16</sup>           | Not stated              | 66.9         | Crude rate (all ages): 176<br>Age-adjusted (all ages): 152<br>(standardized to Estonian general population)                                                                               | 0-39: 0<br>40-49: 22<br>50-59: 127<br>60-69: 493<br>70-79: 1 232<br>≥80: 1 109 |
| Manhattan, USA <sup>17</sup>    | Not stated              | 65.7         | Crude rate (all ages): 106.9                                                                                                                                                              | <45: 1.3<br>45-64: 99.3<br>65-74: 509.5<br>75-84: 1 192.9<br>≥ 85: 823.8       |
| Argentina <sup>18</sup>         | 23.5%                   | 64           | Crude rate (≥40 years): 656.8                                                                                                                                                             | 40-49: 0<br>50-59: 152.9<br>60-69: 636.9<br>70-79: 1727<br>≥80: 3385.4         |
| Brazil <sup>19</sup>            | 72%                     | Not stated   | Crude rate (≥ 65 years): 3 300                                                                                                                                                            | 64-69: 800<br>70-74: 2 900<br>75-79: 2 800<br>80-84: 8 500<br>≥ 85: 14 300     |
| Bolivia <sup>20</sup>           | Not stated              | Not stated   | Crude rate (all ages): 50.2,<br>Crude rate (≥ 40 years): 286,<br>Age-adjusted rate (all ages): 97.3,<br>Age-adjusted rate (≥ 40): 304<br>(Standardized rate to world standard population) | 40-49: 133<br>50-59: 371<br>≥ 60: 443                                          |
| Sydney, Australia <sup>21</sup> | Not stated              | Not stated   | Crude rate (≥ 49 years): 460<br>Age-adjusted rate (all ages): 104<br>Age-adjusted rate (≥ 50): 362<br>(Standardized rate to 2001 Australian population)                                   | 49-59: 0<br>60-69: 480<br>70-79: 820<br>≥80: 560                               |
| Sydney, Australia <sup>22</sup> | Not stated              | Not stated   | Crude rate (≥55 years): 780                                                                                                                                                               | 55-59: 1 639<br>60-69: 1 159<br>70-79: 3 951<br>≥ 80: 9 091                    |

**Appendix 4.** Incidence of Parkinson's disease (per 100 000 person years)

| Study                                   | PD cases             | Crude/<br>age-adjusted incidence rate                                                                                           | Age-specific annual<br>incidence rate                                                                                                    |
|-----------------------------------------|----------------------|---------------------------------------------------------------------------------------------------------------------------------|------------------------------------------------------------------------------------------------------------------------------------------|
| Ferrara, Italy <sup>1</sup>             | 394                  | Crude rate (all ages): 10.01<br>Age-adjusted rate (all ages): 8.55<br>(standardized to Italian population)                      | 35-39: 1.14<br>40-44: 4.35<br>45-49: 6.90<br>50-54: 13.91<br>55-59: 20.99<br>60-64: 43.73<br>65-69: 29.28<br>70-74: 32.51<br>≥ 75: 13.14 |
| Italy <sup>23</sup>                     | 42                   | Crude rate (65-84 years): 346<br>Age-adjusted rate (65-84 years): 326<br>(standardized to Italian population 1992)              | 65-69: 221<br>70-74: 239<br>75-79: 353<br>80-84: 678                                                                                     |
| Sweden <sup>24</sup>                    | 49                   | Crude rate (all ages): 11<br>Age-adjusted rate (all ages): 7.9<br>(standardized to European standard population)                | 30-39: 1.6<br>40-49: 3.3<br>50-59: 9.0<br>60-69: 22.4<br>70-79: 59.4<br>80-89: 79.5                                                      |
| Rotterdam,<br>Netherlands <sup>25</sup> | 67                   | Crude rate in total population: not stated<br>Crude rate (55-85 years): 170                                                     | 55-65: 30<br>65-75: 140<br>75-85: 330<br>≥ 85: 430                                                                                       |
| United<br>Kingdom <sup>26</sup>         | number<br>not stated | Crude rate: not stated<br>Age-adjusted rate (all ages): 19                                                                      | 45-49: 20<br>60-64: 50<br>65-69: 37<br>70-74: 222<br>75-79: 100<br>≥ 80: 116                                                             |
| Cambridge,<br>UK <sup>27</sup>          | 201                  | Crude rate (all ages): 13.6                                                                                                     | 30-39: 0.9<br>40-49: 2.0<br>50-59: 9.6<br>60-69: 41.2<br>70-79: 75.5<br>≥ 80: 86.2                                                       |
| Spain <sup>28</sup>                     | 30                   | Crude rate (≥ 65-85 years): 235.9<br>Age-adjusted rate (≥ 65-85 years): 186.8<br>(standardized to European standard population) | 65-69: 67.5<br>70-74: 225.3<br>75-79: 222.1<br>80-84: 298.8<br>≥ 85: 365.9                                                               |

| Study | PD cases | Crude/ | Age-specific annual |
|-------|----------|--------|---------------------|
|-------|----------|--------|---------------------|

|                                   |     | age-adjusted incidence rate                                                                                                                                        | incidence rate                                                                                                                              |
|-----------------------------------|-----|--------------------------------------------------------------------------------------------------------------------------------------------------------------------|---------------------------------------------------------------------------------------------------------------------------------------------|
| Hawaii <sup>29</sup>              | 92  | Crude rate ( $\geq$ 45-94 years): 53.1<br>Age-adjusted rate (all ages): 11.1<br>Age-adjusted rate ( $\geq$ 50 years): 45.2<br>(standardized to 1970 US population) | 45-49: 0<br>50-54: 6.1<br>55-59: 33.8<br>60-64: 27.6<br>65-69: 45.4<br>70-74: 67<br>75-79: 139.1<br>80-84: 116.9<br>85-89: 84.2<br>90-94: 0 |
| Rochester, USA <sup>30</sup>      | 118 | Age-adjusted rate (all ages): 18.2<br>(standardized to 1970 US population) <sup>a</sup>                                                                            | 0-29: 0<br>30-54: 5.3<br>55-64: 32.2<br>65-74: 113.5<br>75-84: 254.4<br>$\geq$ 85: 155.4                                                    |
| Olmsted, Minnesota <sup>31</sup>  | 154 | Crude rate (all ages): 10.8                                                                                                                                        | 0-29: 0<br>30-49: 1.3<br>50-59: 17.4<br>60-69: 52.5<br>70-79: 93.1<br>80-99: 79.1                                                           |
| Manhattan, USA <sup>17</sup>      | 83  | Crude rate (all age): 13                                                                                                                                           | <45: 0<br>45-64: 10.7<br>65-74: 54.2<br>75-84: 132.6<br>$\geq$ 85: 212.8                                                                    |
| Northern California <sup>32</sup> | 588 | Crude rate (all ages): 12.3<br>Crude rate ( $\geq$ 50 years): 44<br>Age-adjusted rate: 13.4<br>(standardized to 1990 US population)                                | <30: 0<br>30-39: 0.5<br>40-49: 2.5<br>50-59: 9.8<br>60-69: 38.8<br>70-79: 107.2<br>80-89: 119                                               |

<sup>a</sup> Calculated as patients with parkinsonism and without drug-induced PD. PD represented 92% of incident cases.
